# Supplementary material
Source: PubMed Central journal article supplement (PMC8073213)
Supplement: NIHMS1685890-supplement-Supplemental_Material.pdf [file NIHMS1685890-supplement-Supplemental_Material.pdf]

# **Examining Chile's Unique Food Marketing Policy: TV Advertising and Dietary Intake in Preschool Children, a pre- and post- policy study**

## **Online Supporting Information**

Melissa L. Jensen <sup>1,2,3</sup>  
Francesca Dillman Carpentier <sup>4</sup>  
Linda Adair <sup>1</sup>  
Camila Corvalán <sup>5</sup>  
Barry M. Popkin <sup>1,2</sup>  
Lindsey Smith Taillie <sup>1,2</sup>

### **Author details**

<sup>1</sup> Department of Nutrition, Gillings School of Global Public Health, University of North Carolina, Chapel Hill, NC, USA

<sup>2</sup> Global Food Research Program, Carolina Population Center, Chapel Hill, NC, USA.

<sup>3</sup> School of Nutrition, University of Costa Rica, San José, Costa Rica

<sup>4</sup> Hussman School of Media and Journalism, University of North Carolina, Chapel Hill, NC, USA

<sup>5</sup> Instituto de Nutrición y Tecnología de Alimentos, Universidad de Chile, Macul, Chile

<sup>6</sup> Department of Epidemiology, Gillings School of Global Public Health, University of North Carolina, Chapel Hill, NC, USA

### **Correspondence to:**

Lindsey Smith Taillie  
123 W Franklin St, Chapel Hill, NC, 27516  
e-mail: [taillie@unc.edu](mailto:taillie@unc.edu)  
Phone: (919) 962-6092  
Fax: (919) 445-0740

**Table S1.** Cut-offs<sup>1</sup> for defining regulated foods and beverages in the Chilean Law of Food Labelling and Advertising

|                       | Implementation Phase         |                              |                              |
|-----------------------|------------------------------|------------------------------|------------------------------|
|                       | 1 <sup>st</sup> Phase (2016) | 2 <sup>nd</sup> Phase (2018) | 3 <sup>rd</sup> Phase (2019) |
| Per 100 g of solids   |                              |                              |                              |
| Energy (kcal)         | 350                          | 300                          | 275                          |
| Sodium (mg)           | 800                          | 500                          | 400                          |
| Total sugars (g)      | 22.5                         | 15                           | 10                           |
| Saturated fats (g)    | 6                            | 5                            | 4                            |
| Per 100 mL of liquids |                              |                              |                              |
| Energy (kcal)         | 100                          | 80                           | 70                           |
| Sodium (mg)           | 100                          | 100                          | 100                          |
| Total sugars (g)      | 6                            | 5                            | 5                            |
| Saturated fats (g)    | 3                            | 3                            | 3                            |

<sup>1</sup>Cut-offs apply to foods with an added ingredient that increases the natural content of the nutrients of concern. Foods without additions are not subject to the thresholds.

**Table S2.** Sample products included in each food group of analyses

| <b>GROUP</b>                          | <b>INCLUDES</b>                  | <b>SAMPLE PRODUCTS</b>                                                                                 |
|---------------------------------------|----------------------------------|--------------------------------------------------------------------------------------------------------|
| <b>READY-TO-EAT BREAKFAST CEREALS</b> |                                  | Chocapic Nestlé, Milo Nestlé, Trix Nestlé                                                              |
| <b>SALTY SNACKS</b>                   | Crackers                         | Selz mini Arcor, Crackelet Costa, Cracker Selz                                                         |
|                                       | Chips                            | Lays Evercrisp, Cheetos Evercrisp, Original Kryspo                                                     |
| <b>SWEETS AND DESSERTS</b>            | Sweet bakery products            | Queque envasado sin relleno<br>Queque envasado Chocman Costa<br>Queque envasado Mankeke Marinela       |
|                                       | Sweet cookies                    | Mini Kuky McKay<br>Morocha McKay<br>Mini Triton McKay                                                  |
|                                       | Bars                             | Chocolate - Cereal Bar Costa<br>Frutas y yogurt - Cereal Bar Costa<br>Frutos rojos - Cereal Bar Costa  |
|                                       | Gelatin                          | Jalea tradicional, Jalea de frambuesa Nestlé<br>Jalea de frutilla Kids Colun                           |
|                                       | Chocolate and candy              | Gomitas Frugele Ambrosoli, Super 8 Nestlé, Dos en Uno Arcor                                            |
|                                       | Dairy-based desserts             | Chiquitin Nestlé de Frutilla, Mousse Manjarate Soprole,<br>Mousse ChandeLe Nestlé                      |
|                                       | <b>SUGAR SWEETENED BEVERAGES</b> | Sodas                                                                                                  |
| Industrial flavored waters            |                                  | Naranja Sprim, Zuko Durazno, Zuko Frambuesa                                                            |
| Sports drinks                         |                                  | Gatorade Cool Blue                                                                                     |
| Energy drinks                         |                                  | Dark dog                                                                                               |
| <b>MILKS AND YOGURT</b>               | Plain milk                       | Nido Nestlé, Leche entera Soprole / Colun, Leche semidescremada Soprole / Colun                        |
|                                       | Flavored milk                    | Leche con chocolate Soprole, Leche JUNAEB chocolate,<br>Leche JUNAEB frutilla                          |
|                                       | Yogurt                           | Yogurt 1+1 Zucaritas Soprole, Yogurt batido Soprole<br>Frutilla, Yogurt batido Soprole Frutilla Danone |

**Table S3.** Comparison of baseline sample (2016) with and without post-policy (2017) implementation data

| Variables                            | With follow-up (n=853) |      | Missing follow-up (n=87) |      | p-value <sup>1</sup> |
|--------------------------------------|------------------------|------|--------------------------|------|----------------------|
|                                      | Mean                   | SD   | Mean                     | SD   |                      |
| Overall HEFSS foods                  |                        |      |                          |      |                      |
| Absolute quantity (energy)           | 346                    | 258  | 390                      | 275  | 0.13                 |
| Energy adjusted (% kcal)             | 28.6                   | 17.6 | 30.5                     | 16.8 | 0.33                 |
| Nutrients                            |                        |      |                          |      |                      |
| Energy (kcal)                        | 1180                   | 375  | 1224                     | 377  | 0.30                 |
| Total sugars (% energy)              | 28.9                   | 8.8  | 28.8                     | 8.2  | 0.91                 |
| Saturated fat (% energy)             | 10.4                   | 3.3  | 10.4                     | 3.4  | 0.99                 |
| Sodium (mg/1000 kcal)                | 1282                   | 475  | 1294                     | 449  | 0.81                 |
| High-in ad exposure                  |                        |      |                          |      |                      |
| Any high-in product                  | 2.7                    | 3.2  | 2.4                      | 2.9  | 0.52                 |
| High in calorie                      | 1.4                    | 1.6  | 1.2                      | 1.4  | 0.25                 |
| High in total sugars                 | 1.6                    | 2.1  | 1.5                      | 2.0  | 0.67                 |
| High in saturated fat                | 0.9                    | 1.1  | 0.8                      | 0.9  | 0.32                 |
| High in sodium                       | 0.2                    | 0.3  | 0.2                      | 0.2  | 0.32                 |
| Child characteristics                |                        |      |                          |      |                      |
| Sex (% female)                       | 438                    | 51.3 | 46                       | 52.9 | 0.83                 |
| Age (years)                          | 4.79                   | 0.51 | 4.77                     | 0.49 | 0.78                 |
| Weekly screen time                   | 11.65                  | 9.62 | 9.72                     | 7.37 | 0.19                 |
| Primary caregiver characteristics    |                        |      |                          |      |                      |
| Education level (n, %)               |                        |      |                          |      |                      |
| Less than high school                | 145                    | 17.0 | 25                       | 28.7 | 0.01*                |
| High school complete                 | 414                    | 48.5 | 40                       | 46.0 |                      |
| More than high school                | 294                    | 34.5 | 22                       | 25.3 |                      |
| Owns home (n, % yes)                 | 461                    | 54   | 48                       | 55.2 | 0.84                 |
| Lives with spouse or partner         | 475                    | 55.7 | 47                       | 54   | 0.77                 |
| Day of week of interview (n, % week) | 730                    | 85.6 | 75                       | 86.2 | 0.87                 |

<sup>1</sup> Obtained via two-sample t-test for continuous variables and X<sup>2</sup> test for categorical variables.

**Table S4.** Associations between policy implementation (2017 vs 2016) and consumption of overall high-in accounting for mediation by advertising exposure (n=853), and adjusting for children's weight status.

|                                               | a-coefficient <sup>4</sup><br>(policy=> advertising) |        |      | b-coefficient<br>(advertising=> consumption) |        |     | c'-coefficient<br>(policy=> consumption) |        |      | ab<br>(mediation effect) |        |     | ab/[(ab)+c']<br>*100 |
|-----------------------------------------------|------------------------------------------------------|--------|------|----------------------------------------------|--------|-----|------------------------------------------|--------|------|--------------------------|--------|-----|----------------------|
|                                               | $\beta^3$                                            | 99% CI |      | $\beta$                                      | 99% CI |     | $\beta$                                  | 99% CI |      | $\beta$                  | 99% CI |     | %                    |
|                                               |                                                      | LL     | UL   |                                              | LL     | UL  |                                          | LL     | UL   |                          | LL     | UL  |                      |
| <b>Absolute intake (kcal)<sup>1,5</sup></b>   |                                                      |        |      |                                              |        |     |                                          |        |      |                          |        |     |                      |
| Any high-in ad                                | -2.2*                                                | -2.6   | -1.8 | 4                                            | -3     | 10  | -86*                                     | -132   | -40  | -9                       | -23    | 6   | 9.1                  |
| High calorie ads                              | -1.5*                                                | -1.7   | -1.3 | 7                                            | -7     | 21  | -84*                                     | -132   | -35  | -11                      | -31    | 10  | 11.3                 |
| High sugar ads                                | -1.2*                                                | -1.5   | -1.0 | 6                                            | -4     | 15  | -87*                                     | -133   | -42  | -7                       | -19    | 5   | 7.4                  |
| High saturated fat ads                        | -0.9*                                                | -1.0   | -0.8 | 3                                            | -18    | 24  | -92*                                     | -139   | -44  | -3                       | -22    | 16  | 2.7                  |
| High sodium ads                               | -0.1*                                                | -0.1   | 0.0  | 16                                           | -41    | 73  | -93*                                     | -137   | -48  | -2                       | -7     | 4   | 1.7                  |
| <b>Energy adjusted (% kcal)<sup>2,5</sup></b> |                                                      |        |      |                                              |        |     |                                          |        |      |                          |        |     |                      |
| Any high-in ad                                | -2.2*                                                | -2.6   | -1.8 | 0.2                                          | -0.2   | 0.6 | -9.2*                                    | -12.1  | -6.3 | -0.5                     | -1.4   | 0.4 | 4.9                  |
| High calorie ads                              | -1.5*                                                | -1.7   | -1.3 | 0.3                                          | -0.5   | 1.2 | -9.2*                                    | -12.3  | -6.2 | -0.5                     | -1.8   | 0.8 | 5.0                  |
| High sugar ads                                | -1.2*                                                | -1.5   | -1.0 | 0.3                                          | -0.3   | 0.9 | -9.3*                                    | -12.2  | -6.4 | -0.4                     | -1.1   | 0.4 | 3.9                  |
| High saturated fat ads                        | -0.9*                                                | -1.0   | -0.8 | 0.4                                          | -1.0   | 1.7 | -9.4*                                    | -12.4  | -6.3 | -0.3                     | -1.5   | 0.9 | 3.5                  |
| High sodium ads                               | -0.1*                                                | -0.1   | 0.0  | 1.7                                          | -1.9   | 5.3 | -9.5*                                    | -12.3  | -6.7 | -0.2                     | -0.5   | 0.2 | 1.8                  |

<sup>1</sup> Total effect of policy implementation on absolute consumption of high-in products = -95 kcal [99CI: -138, -50]

<sup>2</sup> Total effect of policy implementation on energy adjusted consumption of high-in products = -9.7% kcal [99CI: -12.5, -6.9]

<sup>3</sup> Represents unstandardized regression coefficient.

<sup>4</sup> Expressed in minutes of advertising per week.

<sup>5</sup> Model adjusted for age (months) and sex of child, interview day, mother's education level, home ownership, marital state, and children's weight status.

\* p<0.01

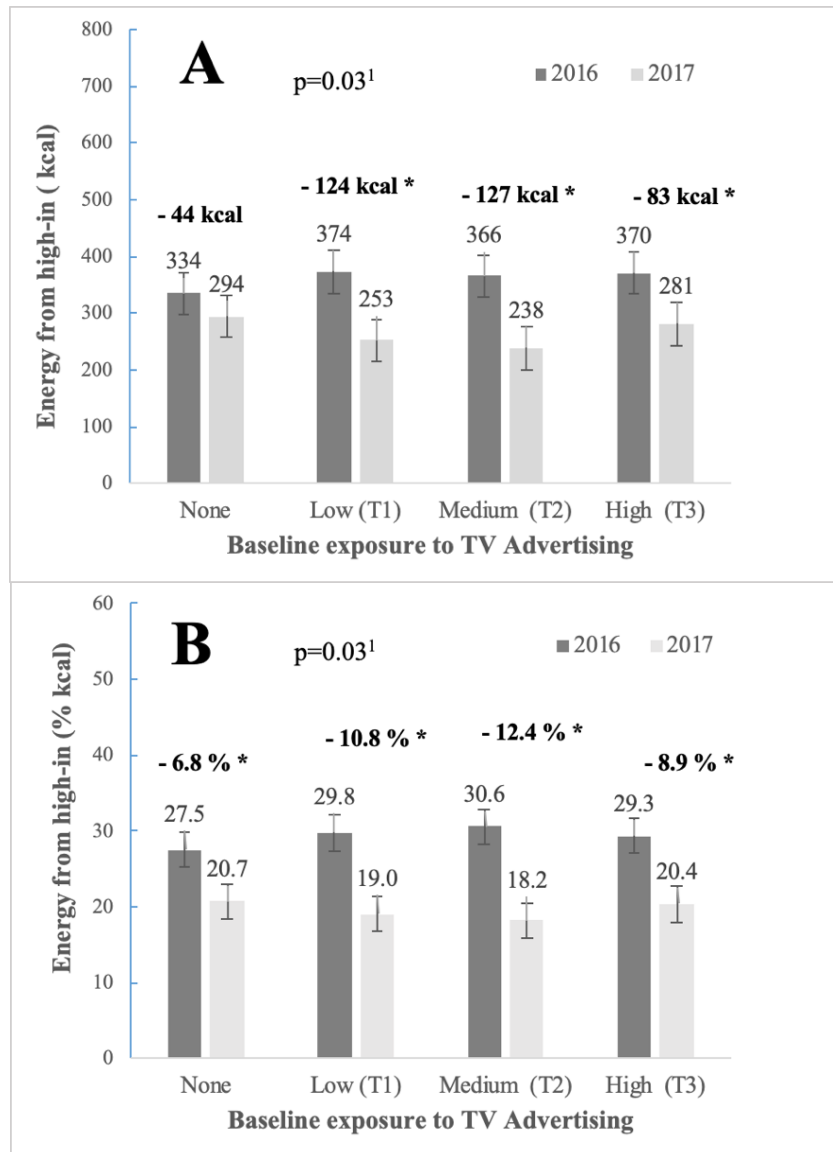

**Figure S1.** Participants (n=853) consumption of high-in foods (A: absolute intake, B: energy adjusted) pre- and post-policy by baseline levels of high-in TV advertising. Estimated using mixed model with individuals as a random effect, adjusting for study covariates and additionally, for children's weight status. <sup>1</sup>Wald test for interaction (year\*baseline ad exposure). \*indicates  $p < .05$ .
